## Antiarrhythmic effect of 9-week hybrid cardiac telerehabilitation - subanalysis of the TELEREhabilitation in Heart Failure patients - TELEREH-HF randomized clinical trial

Orzechowski P.<sup>1</sup>; Piotrowicz R.<sup>2</sup>; Zareba W.<sup>3</sup>; Pencina MJ.<sup>4</sup>; Kowalik I.<sup>5</sup>; Komar E.<sup>6</sup>; Opolski G.<sup>7</sup>; Banach M.<sup>8</sup>; Glowczynska R.<sup>7</sup>; Szalewska D.<sup>9</sup>; Pluta S.<sup>10</sup>; Irzanski R.<sup>11</sup>; Karalus Z.<sup>12</sup>; Piotrowicz E.<sup>1</sup>

<sup>1</sup>National Institute of Cardiology, Telecardiology Center, Warsaw, Poland

<sup>2</sup>National Institute of Cardiology, Department of Coronary Disease and Rehabilitation, Warsaw, Poland

<sup>3</sup>University of Rochester Medical Center, Department of Medicine, Rochester, United States of America

<sup>4</sup>Duke University School of Medicine, Department of Biostatistics and Bioinformatics, Durham, United States of America

<sup>5</sup>National Institute of Cardiology, Warsaw, Poland

<sup>6</sup>Military Institute of Medicine, Warsaw, Poland

<sup>7</sup>Medical University of Warsaw, 1st Chair and Department of Cardiology, Warsaw, Poland

<sup>8</sup>Medical University of Lodz, Department of Hypertension, Lodz, Poland

<sup>9</sup>Medical University of Gdansk, Chair and Clinic of Rehabilitation Medicine, Faculty of Health Sciences, Gdansk, Poland

<sup>10</sup>Silesian Center for Heart Diseases (SCHD), Zabrze, Poland

<sup>11</sup>Medical University of Lodz, Department of Internal Medicine and Cardiac Rehabilitation, Lodz, Poland

<sup>12</sup>Medical University of Silesia, Department of Cardiology, Congenital Heart Disease and Electrotherapy, Katowice, Poland

**Funding Acknowledgements:** Type of funding sources: Public grant(s) – National budget only. Main funding source(s): The National Centre for Research and Development, Warsaw, Poland.

**Background.** Cardiac rehabilitation is a component of heart failure (HF) management but its effect on ventricular arrhythmias is not well recognized.

**Purpose.** We analyzed the antiarrhythmic effect of a 9-week hybrid cardiac telerehabilitation (HCTR) and its influence on long term cardiovascular mortality in HF patients taken from the TELEREH-HF trial.

**Methods.** We evaluated the presence of non-sustained ventricular tachycardia (nsVT) and frequent premature ventricular complexes  $\geq 10$  beats/hour (PVCs  $\geq 10$ ) with 24-hour ECG monitoring at the baseline and after 9-week HCTR or usual care (UC) of 773 HF patients (NYHA I-III, LVEF  $\leq 40\%$ ).

**Results.** Among 143 patients with nsVT, arrhythmia subsided in 30.8% after HCTR, similarly among 165 patients randomized to UC who had nsVT 34.5% did not show them after 9 weeks ( $p = 0.481$ ). There was no significant difference in the decrease in PVC  $\geq 10$  over 9 weeks between randomization arms (14.9% vs. 17.8%, respectively  $p = 0.410$ ). Functional response for HCTR ( $\Delta$  peak oxygen consumption [pVO<sub>2</sub>] in cardiopulmonary exercise test  $> 2.0$  ml/kg/min) did not affect occurrence of arrhythmias. The multivariable analysis of the entire population did not identify HCTR as an independent factor determining improvement in terms of nsVT or PVCs  $> 10$ . However, only in the HCTR group, the achievement of the antiarrhythmic effect significantly reduced the cardiovascular mortality in 2 years follow-up (Logrank  $p = 0.0009$ ) (Figure).

**Conclusions.** Significant improvement in physical capacity after 9 weeks of HCTR did not correlate with the antiarrhythmic effect in terms of incidence of nsVT or PVCs  $\geq 10$ . An antiarrhythmic effect after the 9-week HCTR affected long term cardiovascular mortality in HF patients.

Abstract Figure

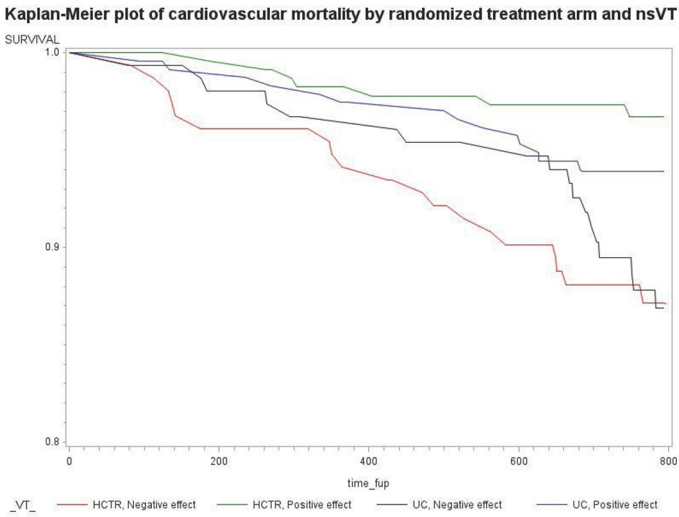

Source: http://academic.oup.com/europace/article-pdf/23/Supplement_3/euab116.050/38130962/euab116.050.pdf
